# Supplementary material
Source: MDPI journal article supplement (https://www.mdpi.com/2073-4352/2/2/176)
Supplement: s1 [file s1]

data_CMKE30F2

_publ_contact_author_name        'K\"ockerling, Martin'

# contact author for X-ray structure 

_publ_contact_author_address     
;
Universit\"at Rostock
Institut f\"ur Chemie
Anorganische Festk\"orperchemie
Albert-Einstein-Str. 3a
D-18059 Rostock
Germany
;

_publ_contact_author_email       'Martin.Koeckerling@uni-rostock.de'
_publ_contact_author_phone       '++49 381 6390'
_publ_contact_author_fax         '++49 381 6382'

loop_
_publ_author_name
_publ_author_address


'Mamat, Constantin'
;
Helholtz-Zentrum Dresden-Rossendorf
Institut f\"ur Radiopharmazie
P.O. Box 50 01 19
D-01314 Dresden
Germany
;

'K\"ockerling, Martin'
;
Universit\"at Rostock
Institut f\"ur Chemie
Anorganische Festk\"orperchemie
Albert-Einstein-Str. 3a
D-18059 Rostock
Germany
;

_audit_creation_method             'ct.exe (M. K\"ockerling, 1996)'

_chemical_name_systematic
;
2-(4-methoxybenzyl)-4-nitro-2H-indazole
;

_chemical_melting_point           408

_chemical_formula_moiety          'C15 H13 N3 O3'
_chemical_formula_sum             'C15 H13 N3 O3' 
_chemical_formula_weight          283.28 
 
loop_ 
 _atom_type_symbol 
 _atom_type_description 
 _atom_type_scat_dispersion_real 
 _atom_type_scat_dispersion_imag 
 _atom_type_scat_source 
 'C'  'C'   0.0033   0.0016 
 'International Tables Vol C Tables 4.2.6.8 and 6.1.1.4' 
 'H'  'H'   0.0000   0.0000 
 'International Tables Vol C Tables 4.2.6.8 and 6.1.1.4' 
 'N'  'N'   0.0061   0.0033 
 'International Tables Vol C Tables 4.2.6.8 and 6.1.1.4' 
 'O'  'O'   0.0106   0.0060 
 'International Tables Vol C Tables 4.2.6.8 and 6.1.1.4' 
 
_symmetry_cell_setting            triclinic 
_symmetry_space_group_name_H-M    'P -1'
 
loop_ 
 _symmetry_equiv_pos_as_xyz 
 'x, y, z' 
 '-x, -y, -z' 
 
_cell_length_a                    6.8994(1) 
_cell_length_b                    9.8052(2) 
_cell_length_c                    11.1525(2) 
_cell_angle_alpha                 71.729(1) 
_cell_angle_beta                  79.436(1) 
_cell_angle_gamma                 74.349(1) 
_cell_volume                      685.83(2) 
_cell_formula_units_Z             2 
_cell_measurement_temperature     143(2) 
_cell_measurement_reflns_used    9944
_cell_measurement_theta_min        2.52
_cell_measurement_theta_max       43.59
_exptl_crystal_description       'trapez'
_exptl_crystal_colour            'colourless'
_exptl_crystal_size_max           0.36 
_exptl_crystal_size_mid           0.34 
_exptl_crystal_size_min           0.28 
_exptl_crystal_density_diffrn     1.372 
_exptl_crystal_density_method     'not measured' 
_exptl_crystal_F_000              296 
_exptl_absorpt_coefficient_mu     0.098 
_exptl_absorpt_correction_type    multi-scan
_exptl_absorpt_correction_T_min   0.9655 
_exptl_absorpt_correction_T_max   0.9730 
_exptl_absorpt_process_details    'Bruker-Nonius SADABS'
 
_diffrn_ambient_temperature       143(2) 
_diffrn_radiation_wavelength      0.71073 
_diffrn_radiation_type            MoK\a 
_diffrn_radiation_source          'fine-focus sealed tube' 
_diffrn_radiation_monochromator   graphite 
_diffrn_measurement_device_type   'CCD area detector'
_diffrn_measurement_method        'phi and omega scans'
_diffrn_reflns_number             30930 
_diffrn_reflns_av_R_equivalents   0.0264 
_diffrn_reflns_av_sigmaI/netI     0.0316 
_diffrn_reflns_limit_h_min        -13 
_diffrn_reflns_limit_h_max        13 
_diffrn_reflns_limit_k_min        -19 
_diffrn_reflns_limit_k_max        18 
_diffrn_reflns_limit_l_min        -21 
_diffrn_reflns_limit_l_max        20 
_diffrn_reflns_theta_min          2.52 
_diffrn_reflns_theta_max          43.97 
_reflns_number_total              10467 
_reflns_number_gt                 8087 
_reflns_threshold_expression      >2sigma(I) 
 
_computing_data_collection        'Bruker SMART'
_computing_cell_refinement        'Bruker SMART'
_computing_data_reduction         'Bruker SAINT'
_computing_structure_solution     'SHELXS-97 (Sheldrick, 1990)'
_computing_structure_refinement   'SHELXL-97 (Sheldrick, 1997)'
_computing_molecular_graphics     'Bruker SHELXTL'
 
_refine_special_details 
; 
 Refinement of F^2^ against ALL reflections.  The weighted R-factor wR and 
 goodness of fit S are based on F^2^, conventional R-factors R are based 
 on F, with F set to zero for negative F^2^. The threshold expression of 
 F^2^ > 2sigma(F^2^) is used only for calculating R-factors(gt) etc. and is 
 not relevant to the choice of reflections for refinement.  R-factors based 
 on F^2^ are statistically about twice as large as those based on F, and R- 
 factors based on ALL data will be even larger. 
; 
 
_refine_ls_structure_factor_coef  Fsqd  
_refine_ls_matrix_type            full 
_refine_ls_weighting_scheme       calc  
_refine_ls_weighting_details 
 'calc w=1/[\s^2^(Fo^2^)+(0.0748P)^2^+0.0541P] where P=(Fo^2^+2Fc^2^)/3' 
_atom_sites_solution_primary      direct 
_atom_sites_solution_secondary    difmap 
_atom_sites_solution_hydrogens    geom 
_refine_ls_hydrogen_treatment     constr 
_refine_ls_extinction_method      none 
_refine_ls_number_reflns          10467 
_refine_ls_number_parameters      190 
_refine_ls_number_restraints      0 
_refine_ls_R_factor_all           0.0580 
_refine_ls_R_factor_gt            0.0428 
_refine_ls_wR_factor_ref          0.1352 
_refine_ls_wR_factor_gt           0.1238 
_refine_ls_goodness_of_fit_ref    1.021 
_refine_ls_restrained_S_all       1.021 
_refine_ls_shift/su_max           0.001 
_refine_ls_shift/su_mean          0.000 

_diffrn_measured_fraction_theta_max    0.977 
_diffrn_reflns_theta_full              43.97 
_diffrn_measured_fraction_theta_full   0.977 
_refine_diff_density_max    0.660 
_refine_diff_density_min   -0.510 
_refine_diff_density_rms    0.057 

 
loop_ 
 _atom_site_label 
 _atom_site_type_symbol 
 _atom_site_fract_x 
 _atom_site_fract_y 
 _atom_site_fract_z 
 _atom_site_U_iso_or_equiv 
 _atom_site_adp_type 
 _atom_site_occupancy 
 _atom_site_symmetry_multiplicity 
 _atom_site_calc_flag 
 _atom_site_refinement_flags 
 _atom_site_disorder_assembly 
 _atom_site_disorder_group 
C1 C 0.40550(7) 0.19957(5) 0.34654(5) 0.01590(7) Uani 1 1 d . . . 
C2 C 0.55034(7) 0.16645(5) 0.43428(4) 0.01426(7) Uani 1 1 d . . . 
C3 C 0.48410(7) 0.21216(6) 0.54619(5) 0.01684(7) Uani 1 1 d . . . 
C4 C 0.28749(8) 0.28701(6) 0.56875(5) 0.02109(9) Uani 1 1 d . . . 
H4A H 0.2454 0.3178 0.6440 0.025 Uiso 1 1 calc R . . 
C5 C 0.14783(8) 0.31818(7) 0.47969(6) 0.02259(9) Uani 1 1 d . . . 
H5A H 0.0125 0.3696 0.4966 0.027 Uiso 1 1 calc R . . 
C6 C 0.20330(8) 0.27589(7) 0.36939(6) 0.02080(9) Uani 1 1 d . . . 
H6A H 0.1085 0.2974 0.3104 0.025 Uiso 1 1 calc R . . 
N1 N 0.48863(7) 0.14810(5) 0.24492(4) 0.01810(7) Uani 1 1 d . . . 
N2 N 0.68119(6) 0.08373(5) 0.26909(4) 0.01574(7) Uani 1 1 d . . . 
C7 C 0.72812(7) 0.09100(5) 0.37890(4) 0.01542(7) Uani 1 1 d . . . 
H7A H 0.8556 0.0527 0.4117 0.019 Uiso 1 1 calc R . . 
N4 N 0.62418(8) 0.17895(6) 0.63970(5) 0.02224(9) Uani 1 1 d . . . 
O1 O 0.80178(7) 0.11956(7) 0.61320(5) 0.02959(10) Uani 1 1 d . . . 
O2 O 0.55977(10) 0.20918(9) 0.74077(6) 0.04164(15) Uani 1 1 d . . . 
C8 C 0.82338(8) 0.02067(6) 0.17426(5) 0.01832(8) Uani 1 1 d . . . 
H8A H 0.7513 -0.0243 0.1332 0.022 Uiso 1 1 calc R . . 
H8B H 0.9329 -0.0579 0.2171 0.022 Uiso 1 1 calc R . . 
C9 C 0.91413(7) 0.13750(5) 0.07446(4) 0.01582(7) Uani 1 1 d . . . 
C10 C 1.09006(8) 0.16852(6) 0.09296(5) 0.01820(8) Uani 1 1 d . . . 
H10A H 1.1552 0.1123 0.1669 0.022 Uiso 1 1 calc R . . 
C11 C 1.17253(8) 0.28046(6) 0.00517(5) 0.01891(8) Uani 1 1 d . . . 
H11A H 1.2920 0.3009 0.0194 0.023 Uiso 1 1 calc R . . 
C12 C 1.07741(7) 0.36200(6) -0.10376(5) 0.01709(8) Uani 1 1 d . . . 
C13 C 0.90259(8) 0.33006(6) -0.12457(5) 0.01968(8) Uani 1 1 d . . . 
H13A H 0.8392 0.3845 -0.1995 0.024 Uiso 1 1 calc R . . 
C14 C 0.82176(8) 0.21891(6) -0.03582(5) 0.01846(8) Uani 1 1 d . . . 
H14A H 0.7027 0.1980 -0.0502 0.022 Uiso 1 1 calc R . . 
O3 O 1.14561(7) 0.47282(5) -0.19669(4) 0.02307(8) Uani 1 1 d . . . 
C15 C 1.31429(10) 0.51629(7) -0.17410(7) 0.02716(11) Uani 1 1 d . . . 
H15A H 1.3486 0.5960 -0.2471 0.041 Uiso 1 1 calc R . . 
H15B H 1.4307 0.4318 -0.1620 0.041 Uiso 1 1 calc R . . 
H15C H 1.2792 0.5508 -0.0977 0.041 Uiso 1 1 calc R . . 
 
loop_ 
 _atom_site_aniso_label 
 _atom_site_aniso_U_11 
 _atom_site_aniso_U_22 
 _atom_site_aniso_U_33 
 _atom_site_aniso_U_23 
 _atom_site_aniso_U_13 
 _atom_site_aniso_U_12 
C1 0.01394(16) 0.01743(17) 0.01612(16) -0.00392(13) -0.00341(12) -0.00293(13) 
C2 0.01355(15) 0.01530(16) 0.01355(15) -0.00317(12) -0.00202(11) -0.00331(12) 
C3 0.01729(17) 0.01845(18) 0.01518(16) -0.00543(14) -0.00203(13) -0.00367(14) 
C4 0.0194(2) 0.0225(2) 0.0214(2) -0.00956(17) 0.00018(15) -0.00239(16) 
C5 0.01573(19) 0.0231(2) 0.0277(2) -0.00984(19) -0.00150(16) 0.00020(16) 
C6 0.01506(18) 0.0226(2) 0.0244(2) -0.00710(17) -0.00536(15) -0.00090(15) 
N1 0.01600(15) 0.02226(18) 0.01677(15) -0.00607(13) -0.00411(12) -0.00326(13) 
N2 0.01492(14) 0.01789(16) 0.01455(14) -0.00492(12) -0.00163(11) -0.00348(12) 
C7 0.01364(15) 0.01774(17) 0.01448(15) -0.00403(13) -0.00227(12) -0.00292(13) 
N4 0.0238(2) 0.0267(2) 0.01836(17) -0.00860(16) -0.00565(14) -0.00432(16) 
O1 0.01936(18) 0.0456(3) 0.02423(19) -0.01148(19) -0.00678(14) -0.00298(17) 
O2 0.0424(3) 0.0601(4) 0.0266(2) -0.0273(3) -0.0107(2) 0.0041(3) 
C8 0.02016(19) 0.01837(18) 0.01728(17) -0.00731(15) 0.00123(14) -0.00520(15) 
C9 0.01605(16) 0.01815(18) 0.01408(15) -0.00621(13) -0.00102(12) -0.00364(13) 
C10 0.01852(18) 0.0213(2) 0.01503(16) -0.00324(14) -0.00454(13) -0.00526(15) 
C11 0.01756(18) 0.0222(2) 0.01755(18) -0.00393(15) -0.00395(14) -0.00609(15) 
C12 0.01654(17) 0.01811(18) 0.01516(16) -0.00417(14) -0.00092(13) -0.00264(14) 
C13 0.01739(18) 0.0242(2) 0.01577(17) -0.00330(15) -0.00435(14) -0.00295(15) 
C14 0.01609(17) 0.0239(2) 0.01641(17) -0.00603(15) -0.00337(13) -0.00467(15) 
O3 0.02271(17) 0.02193(18) 0.02057(17) 0.00014(13) -0.00129(13) -0.00637(14) 
C15 0.0260(3) 0.0226(2) 0.0318(3) -0.0047(2) 0.0006(2) -0.0098(2) 
 
_geom_special_details 
; 
 All esds (except the esd in the dihedral angle between two l.s. planes) 
 are estimated using the full covariance matrix.  The cell esds are taken 
 into account individually in the estimation of esds in distances, angles 
 and torsion angles; correlations between esds in cell parameters are only 
 used when they are defined by crystal symmetry.  An approximate (isotropic) 
 treatment of cell esds is used for estimating esds involving l.s. planes. 
; 
 
loop_ 
 _geom_bond_atom_site_label_1 
 _geom_bond_atom_site_label_2 
 _geom_bond_distance 
 _geom_bond_site_symmetry_2 
C1 N1 1.3536(7) .   
C1 C6 1.4132(7) .   
C1 C2 1.4303(6) .   
C2 C7 1.3973(7) .   
C2 C3 1.4137(6) .   
C3 C4 1.3768(7) .   
C3 N4 1.4541(7) .   
C4 C5 1.4178(8) .   
C4 H4A 0.9500 .   
C5 C6 1.3760(8) .   
C5 H5A 0.9500 .   
C6 H6A 0.9500 .   
N1 N2 1.3447(6) .   
N2 C7 1.3499(6) .   
N2 C8 1.4716(6) .   
C7 H7A 0.9500 .   
N4 O2 1.2291(7) .   
N4 O1 1.2321(7) .   
C8 C9 1.5083(7) .   
C8 H8A 0.9900 .   
C8 H8B 0.9900 .   
C9 C10 1.3925(7) .   
C9 C14 1.3976(7) .   
C10 C11 1.3949(7) .   
C10 H10A 0.9500 .   
C11 C12 1.3950(7) .   
C11 H11A 0.9500 .   
C12 O3 1.3664(6) .   
C12 C13 1.3995(7) .   
C13 C14 1.3884(8) .   
C13 H13A 0.9500 .   
C14 H14A 0.9500 .   
O3 C15 1.4290(8) .   
C15 H15A 0.9800 .   
C15 H15B 0.9800 .   
C15 H15C 0.9800 .   
 
loop_ 
 _geom_angle_atom_site_label_1 
 _geom_angle_atom_site_label_2 
 _geom_angle_atom_site_label_3 
 _geom_angle 
 _geom_angle_site_symmetry_1 
 _geom_angle_site_symmetry_3 
N1 C1 C6 126.97(4) . .   
N1 C1 C2 111.27(4) . .   
C6 C1 C2 121.75(4) . .   
C7 C2 C3 137.97(4) . .   
C7 C2 C1 104.41(4) . .   
C3 C2 C1 117.61(4) . .   
C4 C3 C2 120.90(5) . .   
C4 C3 N4 119.23(5) . .   
C2 C3 N4 119.87(4) . .   
C3 C4 C5 120.03(5) . .   
C3 C4 H4A 120.0 . .   
C5 C4 H4A 120.0 . .   
C6 C5 C4 121.68(5) . .   
C6 C5 H5A 119.2 . .   
C4 C5 H5A 119.2 . .   
C5 C6 C1 118.02(5) . .   
C5 C6 H6A 121.0 . .   
C1 C6 H6A 121.0 . .   
N2 N1 C1 103.67(4) . .   
N1 N2 C7 114.88(4) . .   
N1 N2 C8 119.27(4) . .   
C7 N2 C8 125.74(4) . .   
N2 C7 C2 105.75(4) . .   
N2 C7 H7A 127.1 . .   
C2 C7 H7A 127.1 . .   
O2 N4 O1 123.62(5) . .   
O2 N4 C3 118.85(5) . .   
O1 N4 C3 117.52(5) . .   
N2 C8 C9 111.02(4) . .   
N2 C8 H8A 109.4 . .   
C9 C8 H8A 109.4 . .   
N2 C8 H8B 109.4 . .   
C9 C8 H8B 109.4 . .   
H8A C8 H8B 108.0 . .   
C10 C9 C14 118.85(4) . .   
C10 C9 C8 119.97(4) . .   
C14 C9 C8 121.16(4) . .   
C9 C10 C11 121.32(5) . .   
C9 C10 H10A 119.3 . .   
C11 C10 H10A 119.3 . .   
C10 C11 C12 119.21(4) . .   
C10 C11 H11A 120.4 . .   
C12 C11 H11A 120.4 . .   
O3 C12 C11 124.31(5) . .   
O3 C12 C13 115.68(5) . .   
C11 C12 C13 119.99(5) . .   
C14 C13 C12 120.05(5) . .   
C14 C13 H13A 120.0 . .   
C12 C13 H13A 120.0 . .   
C13 C14 C9 120.56(4) . .   
C13 C14 H14A 119.7 . .   
C9 C14 H14A 119.7 . .   
C12 O3 C15 117.21(5) . .   
O3 C15 H15A 109.5 . .   
O3 C15 H15B 109.5 . .   
H15A C15 H15B 109.5 . .   
O3 C15 H15C 109.5 . .   
H15A C15 H15C 109.5 . .   
H15B C15 H15C 109.5 . .   
 
# eof
